# Supplementary material for: Quantitative Loop-Mediated Isothermal Amplification Detection of Ustilaginoidea virens Causing Rice False Smut
Source: MDPI journal article supplement (doi:10.3390/ijms241210388), 2023-06-20
Supplement: s1 [file s1]

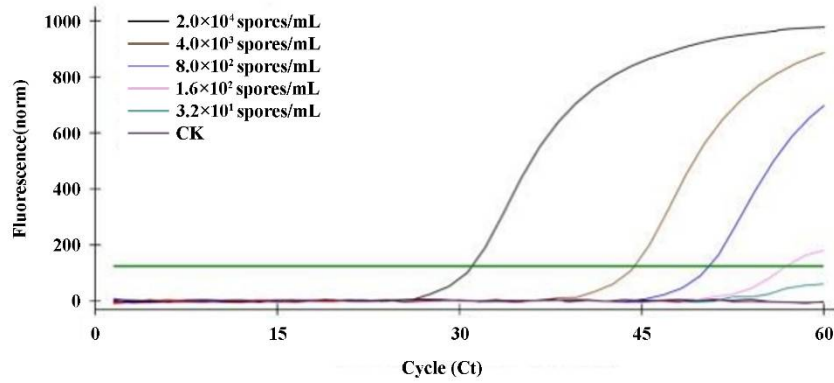

**Figure S1.** Sensitivity validation of q-PCR detection system. The fluorescence signals in q-PCR detection assays were detected in the samples with DNA template of  $2 \times 10^4$  spores/mL,  $4 \times 10^3$  spores/mL,  $8 \times 10^2$  spores/mL and  $1.6 \times 10^2$  spores/mL within 60 min, while no signals were detected in sample with DNA template of 32 spores/mL and CK and other spore concentrations. The green line (horizontal) indicates fluorescence threshold. Fluorescence signals above this threshold marked as a successful detection for *U. virens* in q-LAMP assays.

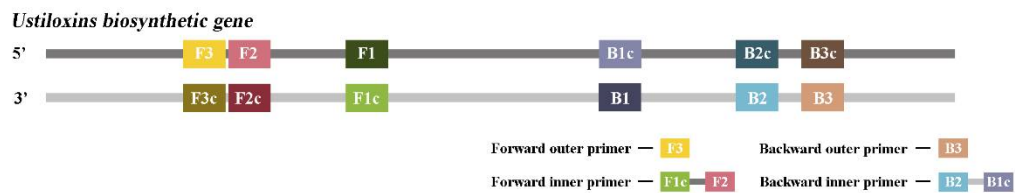

**Figure S2.** Model for q-LAMP and q-PCR primers design. Primers for q-LAMP assays consist of F3, B3, FIP, and BIP. FIP is a hybrid primer consisting of the F1c and F2 sequences; BIP is a hybrid primer consisting of the B1c and B2 sequences. Primers for q-PCR assays consist of F3 and B3.
