# Supplementary material for: Quantitative Loop-Mediated Isothermal Amplification Detection of Ustilaginoidea virens Causing Rice False Smut
Source: MDPI journal article supplement (doi:10.3390/ijms241210388), 2023-06-20
Supplement: s1 [file s1]

**Table S1.** q-LAMP assay results for standard curve establishment.

| <b>Amplification time (x)</b> |                 |                 |             | <b>The Log<sub>10</sub> value of<br/>spore number (y)</b> |
|-------------------------------|-----------------|-----------------|-------------|-----------------------------------------------------------|
| <b>Repeat 1</b>               | <b>Repeat 2</b> | <b>Repeat 3</b> | <b>Mean</b> |                                                           |
| 23.81                         | 27.26           | 28.73           | 26.6        | 6                                                         |
| 29.43                         | 31.74           | 33.15           | 31.44       | 5                                                         |
| 33.30                         | 35.16           | 35.58           | 34.68       | 4                                                         |
| 37.45                         | 38.11           | 38.20           | 37.92       | 3                                                         |
| 40.97                         | 40.85           | 41.66           | 41.16       | 2                                                         |
| 45.12                         | 42.93           | 45.15           | 44.4        | 1                                                         |
